# Supplementary material
Source: PubMed Central journal article supplement (PMC2655404)
Supplement: 2008.159814_1.pdf [file 2008.159814_1.pdf]

Supp figure 1

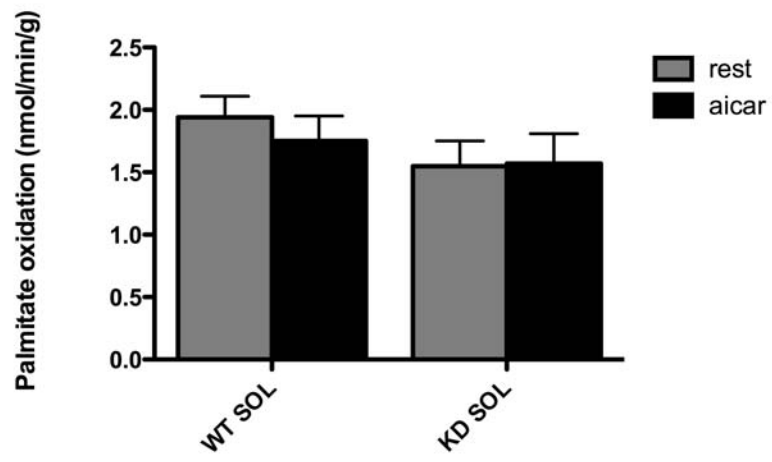

Supp figure 2A

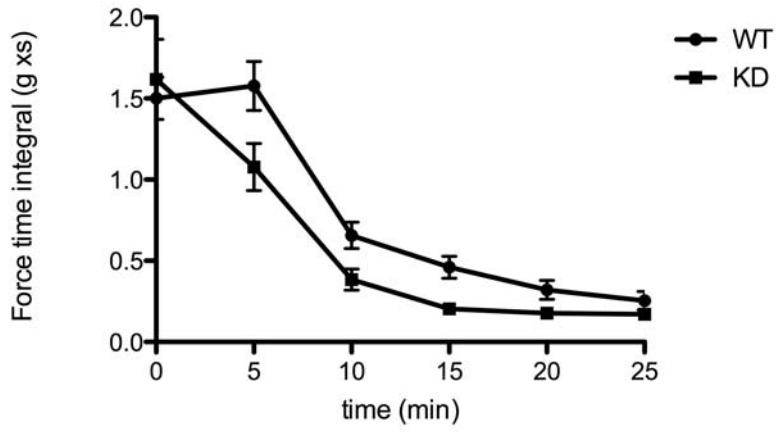

Supp figure 2B

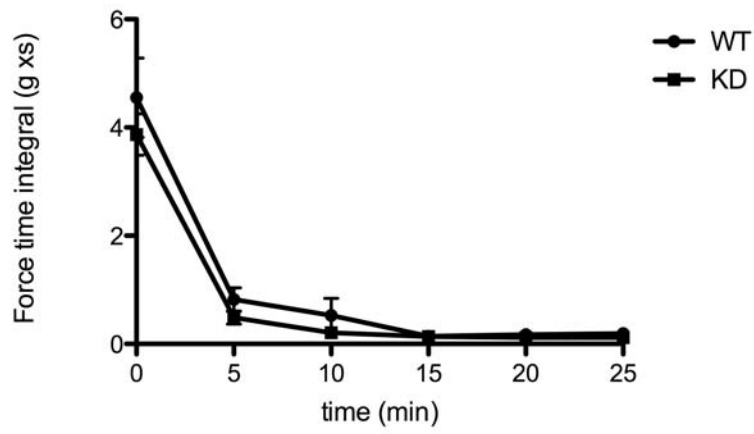

Supp figure 3

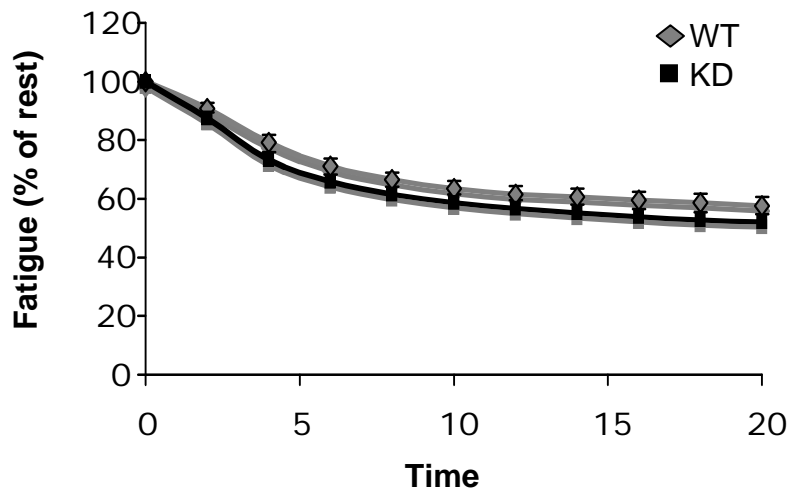

Supp figure 4

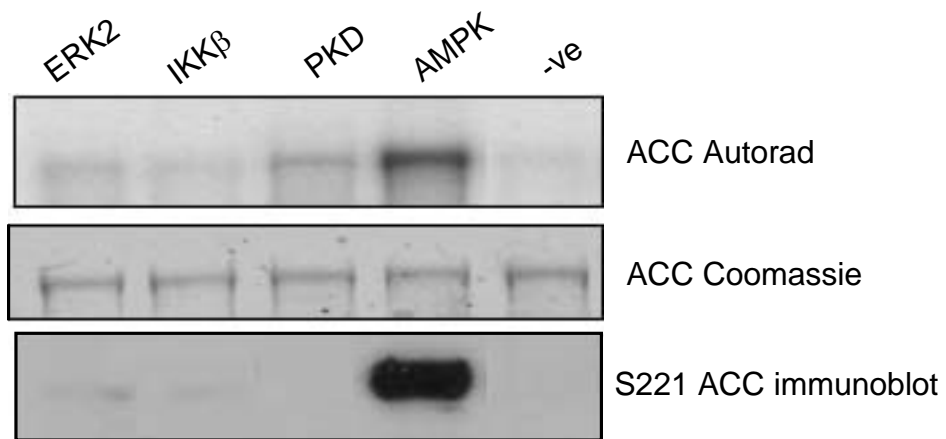

### **Supplementary Figures Legends.**

**Supp Figure 1. Rates of palmitate oxidation in the presence of 0.25 mM palmitate** Rates of fatty acid oxidation were measured in isolated SOL muscle from WT and KD mice in the presence of 0.25 mM palmitate. Data are mean  $\pm$  SEM, n = 8-9.

**Supp Figure 2. Force generation during contraction** The force time integral was calculated at time points shown for contracting isolated EDL (A) and SOL (B) from WT and KD mice. All data are mean  $\pm$  SEM, n = 7-8.

**Supp Figure 3. Muscle fatigue during *in situ* contraction.** Fatigue was measured in contracting TA muscle from WT and KD animals over the 20 min protocol and expressed as a percentage of rest. Data are mean  $\pm$  SEM, n = 12.

**Supp Figure 4. *In vitro* phosphorylation of ACC.** Autoradiograph and immunoblotting of *in vitro* phosphorylation of ACC2 by AMPK, ERK 2, IKK  $\beta$  or PKD in the presence of [ $\gamma$ - $^{32}$ P] ATP.
